# Supplementary material for: Magnetorheological Elastomer-Based Self-Powered Triboelectric Nanosensor for Monitoring Magnetic Field
Source: MDPI journal article supplement (doi:10.3390/nano11112815), 2021-10-23
Supplement: s1 [file s1]

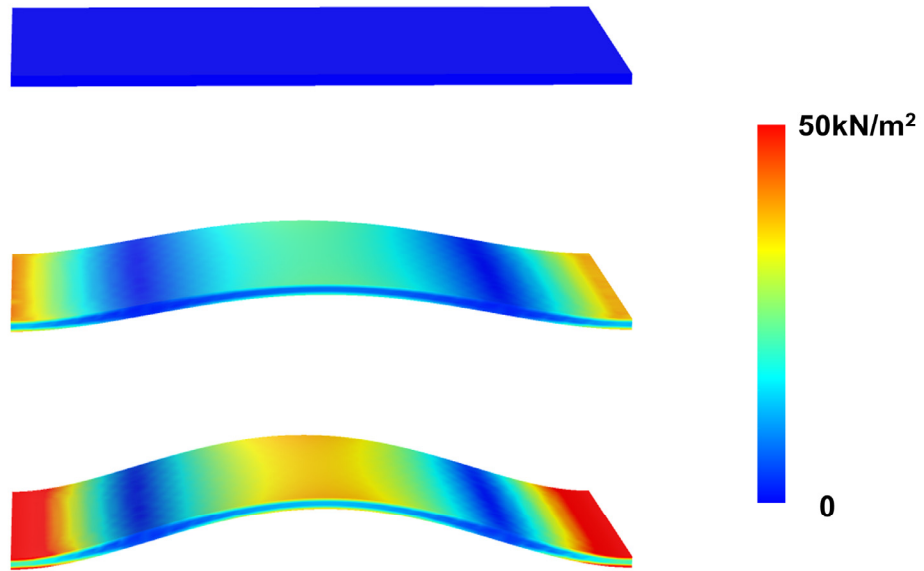

**Figure S1.** Simulation drawing of stress and strain experiment.

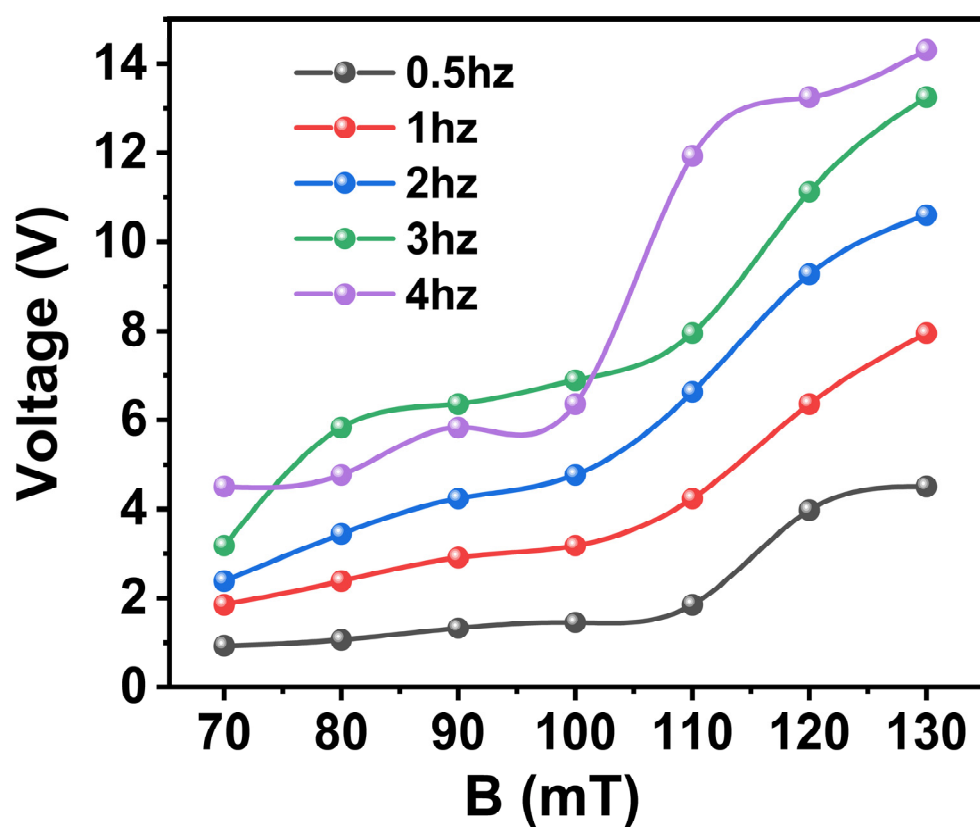

**Figure S2.** The output performance of the TENG under different sliding frequencies and magnetic field strengths in 2D.

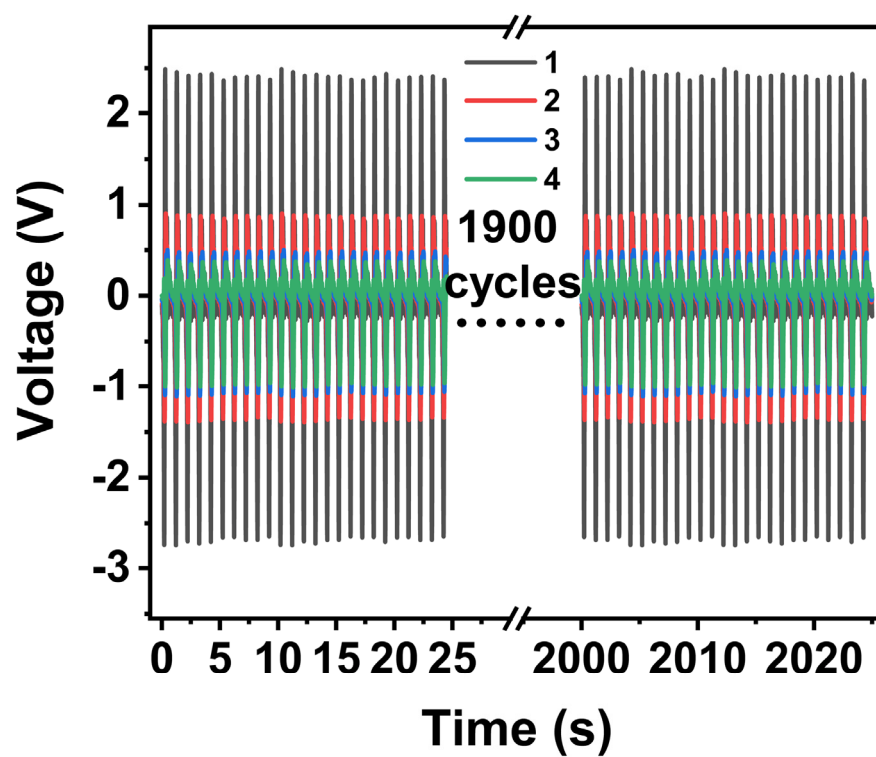

Figure S3. The cycle tests of the TENG devices (the time for each cycle is 1s).

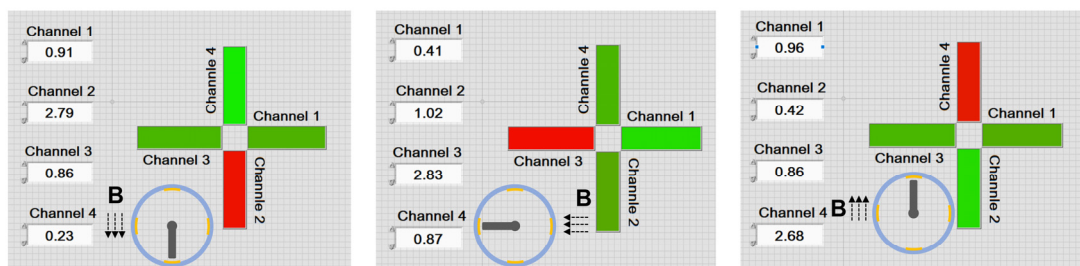

**Figure S4.** Mapping image when the magnet is close to channels 2, 3 and 4.

**Table S1.** Comparison of the achievement of our sensor with other competing sensing technologies.

| Technology                | Representative instrument               | Achievement                                     |
|---------------------------|-----------------------------------------|-------------------------------------------------|
| TENG                      | Our sensor                              | Self-powerd                                     |
| Magnetic force            | Torque Magnetometer                     | Compare and detect magnetic fields              |
| Hall effect               | Hall effect magnetometer                | Working under various environmental conditions. |
| Fluxgate                  | Fluxgate magnetometer                   | Measurement of weak magnetic field              |
| Magnetic resonance        | Nuclear magnetic resonance magnetometer | High accuracy                                   |
| Superconductivity effects | Superconducting quantum magnetometer    | Higher sensitivity                              |
